# Supplementary material for: Role of occupational therapy in musicians’ health: a scoping review protocol
Source: HighWire-hosted journal article supplement (doi:10.1136/bmjopen-2020-040922), 2020-12-01
Supplement: bmjopen-2020-040922supp001_data_supplement.pdf [file bmjopen-2020-040922supp001_data_supplement.pdf]

### Appendix I. Search Strategy

Ovid MEDLINE(R) and Epub Ahead of Print, In-Process & Other Non-Indexed Citations and Daily <1946 to July 12, 2019> Results =12

| # | Search Statement                                                                                                                                                                                                                                                                                                                                                                                                                                                                                                                                                                                                                                                                                                                                                                                                                                                                                                                                                                                                                                                                                                                                                                                                                                                                                                                                                                                                                                                                                                                                                                                                                                                                                                                                                                                                                                                                                                                                                                                                                                                                                                                                                                                                                                                                                                                                                                                                                                                                                                                                                                                                                                                           | Results |
|---|----------------------------------------------------------------------------------------------------------------------------------------------------------------------------------------------------------------------------------------------------------------------------------------------------------------------------------------------------------------------------------------------------------------------------------------------------------------------------------------------------------------------------------------------------------------------------------------------------------------------------------------------------------------------------------------------------------------------------------------------------------------------------------------------------------------------------------------------------------------------------------------------------------------------------------------------------------------------------------------------------------------------------------------------------------------------------------------------------------------------------------------------------------------------------------------------------------------------------------------------------------------------------------------------------------------------------------------------------------------------------------------------------------------------------------------------------------------------------------------------------------------------------------------------------------------------------------------------------------------------------------------------------------------------------------------------------------------------------------------------------------------------------------------------------------------------------------------------------------------------------------------------------------------------------------------------------------------------------------------------------------------------------------------------------------------------------------------------------------------------------------------------------------------------------------------------------------------------------------------------------------------------------------------------------------------------------------------------------------------------------------------------------------------------------------------------------------------------------------------------------------------------------------------------------------------------------------------------------------------------------------------------------------------------------|---------|
| 1 | (((music or musical or harp or harps or recorder or recorders or synthesizer* or tuba or tubas) adj3 (performer* or artist* or player* or student* or teacher* or instructor*)).mp. or ((Musician* or instrumentalist* or accordionist* or bagpiper* or bassist* or bassoonist or cellist* or conguera* or conguero* or drummer* or fiddler* or Flautist* or flutist or harpist* or guitarist* or keyboardist* or keytarist* or organist or organists or percussionist* or pipers or saxaphonist* or trumpeter or trumpeters or tubaist or tubist or vibraphonist* or vibraharpist* or violinist* or (Accordion* or alphorn* or alpenhorn* or alpine horn* or Bagpipe* or Balalaika or (Bandura* not (Bandura* adj4 (self efficacy or theor*))) or Banjo* or Bariton* or Bass guitar* or Bassoon* or Berimbau or Bongo or Bongos or Boom whacker* or boomwhacker* or Bouzouki* or Bugle* or Cello or Cellos or Chapman Stick* or Cimbalom or Clarinet* or Clavichord or Concertina* or (Conga not glyceci*) or Contrabass* or Cor anglais* or Cornet* or Cymbal or Cymbals or Didgeridoo* or Djembe or Double bass* or Drum or Drums or Dulcimer* or Euphoni* or Fiddle or Fiddles or Fifes or Flute or Flutes or Flugelhorn* or French horn* or Fujara or Glockenspiel* or (Gaira not cuckoo*) or Guitar or Guitars or Hand Bell* or Harmonica* or Harmonium* or Harpsichord* or Hurdy gurd* or Jew's harp* or Kalimba* or Lute or Lutes or Lyre* or Mandolin* or Maraca or Maracas or Marimba* or Melodica* or Melodion or Oboe or Oboes or Ocarina* or Octobass* or ((organ or organs) adj2 (pipe or pipes or reed or pump)) or ((Pan or Parlour or Uilleann) adj2 Pipe*) or Pennywhistle* or Piano or Pianos or Piccolo* or Pungi* or Saxophone* or Sitar* or Sousaphone* or Spinet or Svirel or Tabla or Tambourine* or Thoramin or Thoramins or Timbale* or Timpani* or Tin Whistle* or Tinwhistle* or Trombon* or Trumpet* or Theremin* or Tubas or Tubular Bells or Tumbadora or Ukulele* or Vibraphone or ((Viola or Violas) not (oil or oils or oderata or violet*)) or (Violin* not plot*) or Whamola* or Woodwind* or Wood wind or Wood Winds or Xylophone* or Zeusaphone or Zither*).mp. or (exp Music/ and (performer* or artist* or player* or student* or teacher* or instructor*).mp.)) not (fish* or poultry or chicken* or bird or birds or laboratory animals).mp. [mp=title, abstract, original title, name of substance word, subject heading word, floating sub-heading word, keyword heading word, organism supplementary concept word, protocol supplementary concept word, rare disease supplementary concept word, unique identifier, synonyms] | 14694   |
| 2 | Occupational Therapy.mp. or exp Occupational Therapy/                                                                                                                                                                                                                                                                                                                                                                                                                                                                                                                                                                                                                                                                                                                                                                                                                                                                                                                                                                                                                                                                                                                                                                                                                                                                                                                                                                                                                                                                                                                                                                                                                                                                                                                                                                                                                                                                                                                                                                                                                                                                                                                                                                                                                                                                                                                                                                                                                                                                                                                                                                                                                      | 16697   |
| 3 | Occupational therapist*.mp.                                                                                                                                                                                                                                                                                                                                                                                                                                                                                                                                                                                                                                                                                                                                                                                                                                                                                                                                                                                                                                                                                                                                                                                                                                                                                                                                                                                                                                                                                                                                                                                                                                                                                                                                                                                                                                                                                                                                                                                                                                                                                                                                                                                                                                                                                                                                                                                                                                                                                                                                                                                                                                                | 5386    |
| 4 | 2 or 3                                                                                                                                                                                                                                                                                                                                                                                                                                                                                                                                                                                                                                                                                                                                                                                                                                                                                                                                                                                                                                                                                                                                                                                                                                                                                                                                                                                                                                                                                                                                                                                                                                                                                                                                                                                                                                                                                                                                                                                                                                                                                                                                                                                                                                                                                                                                                                                                                                                                                                                                                                                                                                                                     | 18814   |
| 5 | 1 and 4                                                                                                                                                                                                                                                                                                                                                                                                                                                                                                                                                                                                                                                                                                                                                                                                                                                                                                                                                                                                                                                                                                                                                                                                                                                                                                                                                                                                                                                                                                                                                                                                                                                                                                                                                                                                                                                                                                                                                                                                                                                                                                                                                                                                                                                                                                                                                                                                                                                                                                                                                                                                                                                                    | 17      |
| 6 | (Alzheimer* or "nursing home*" or "music* therap*").mp. [mp=title, abstract, original title, name of substance word, subject heading word, floating sub-heading word, keyword heading word, organism supplementary concept word, protocol supplementary concept word, rare disease supplementary concept word, unique identifier, synonyms]                                                                                                                                                                                                                                                                                                                                                                                                                                                                                                                                                                                                                                                                                                                                                                                                                                                                                                                                                                                                                                                                                                                                                                                                                                                                                                                                                                                                                                                                                                                                                                                                                                                                                                                                                                                                                                                                                                                                                                                                                                                                                                                                                                                                                                                                                                                                | 194983  |

|   |         |    |
|---|---------|----|
| 7 | 5 not 6 | 12 |
|---|---------|----|

## Appendix II. Proposed data extraction tool

|                      |                             |                  |
|----------------------|-----------------------------|------------------|
| <b>Study ID:</b>     | <b>Date form completed:</b> |                  |
| <b>First author:</b> | <b>Year of study:</b>       | <b>Reviewer:</b> |

### 1. General Information

|                   |                                                                                                                    |
|-------------------|--------------------------------------------------------------------------------------------------------------------|
| Publication type: | Journal Article <input type="checkbox"/> Abstract <input type="checkbox"/> Other (specify e.g. book chapter) _____ |
| Country of study: |                                                                                                                    |

### 2. Study Eligibility

| Study Characteristics       |                                                            |                                                                                                                                               |  |
|-----------------------------|------------------------------------------------------------|-----------------------------------------------------------------------------------------------------------------------------------------------|--|
| <b>Type of study</b>        | Is the study health related?                               | Yes <input type="checkbox"/> No <input type="checkbox"/> <b>Exclude</b> <input type="checkbox"/> Unclear <input type="checkbox"/><br>Details: |  |
| <b>Participants</b>         | Are participants defined as instrumental musicians?        | Yes <input type="checkbox"/> No <input type="checkbox"/> <b>Exclude</b> <input type="checkbox"/> Unclear <input type="checkbox"/><br>Details: |  |
| <b>Health care provider</b> | Do occupational therapists have explicit involvement?      | Yes <input type="checkbox"/> No <input type="checkbox"/> <b>Exclude</b> <input type="checkbox"/> Unclear <input type="checkbox"/><br>Details: |  |
|                             | Is there potential for occupational therapist involvement? | Yes <input type="checkbox"/> No <input type="checkbox"/> <b>Exclude</b> <input type="checkbox"/> Unclear <input type="checkbox"/><br>Details: |  |
| <b>Music Therapy</b>        | Does it explicitly include music therapy                   | No <input type="checkbox"/> Yes <input type="checkbox"/> <b>Exclude</b> <input type="checkbox"/> Unclear <input type="checkbox"/><br>Details: |  |

### SUMMARY OF ASSESSMENT FOR INCLUSION

|                                                                                                        |                                                                               |
|--------------------------------------------------------------------------------------------------------|-------------------------------------------------------------------------------|
| Include in review <input type="checkbox"/> Exclude from review <input type="checkbox"/>                |                                                                               |
| Independently assessed, and then compared?<br>Yes <input type="checkbox"/> No <input type="checkbox"/> | Differences resolved Yes <input type="checkbox"/> No <input type="checkbox"/> |
| Request further details? Yes <input type="checkbox"/> No <input type="checkbox"/>                      | Contact details of authors:                                                   |
| <b>Notes:</b>                                                                                          |                                                                               |
